# Supplementary material
Source: Springer Nature journal article supplement (https://www.springermedizin.de/resource/supplementary/13012_2012_714_MOESM4_ESM.pdf/9630310)

Difference

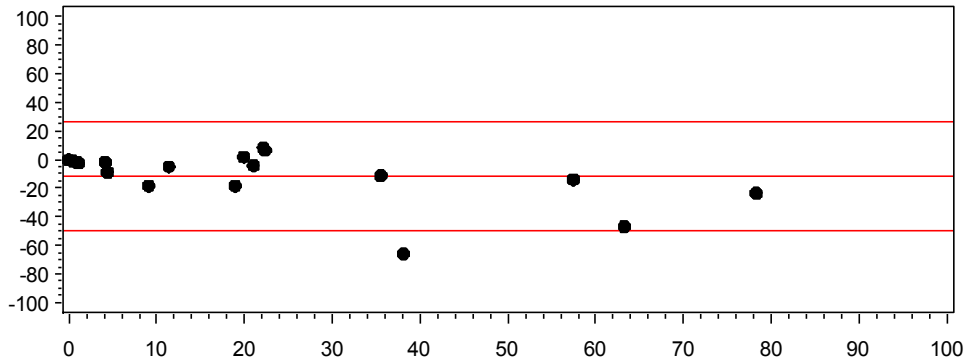

Average

Bland-Altman Plot

Supplement: MOESM4 [file 9630310]
